# Supplementary material for: Nitrate restricts nodule organogenesis through inhibition of cytokinin biosynthesis in Lotus japonicus
Source: PubMed Central journal article supplement (PMC8585978; doi:10.1038/s41467-021-26820-9), 2021-11-11
Supplement: 41467_2021_26820_MOESM1_ESM.pdf [file 41467_2021_26820_MOESM1_ESM.pdf]

## Supplementary figures and tables

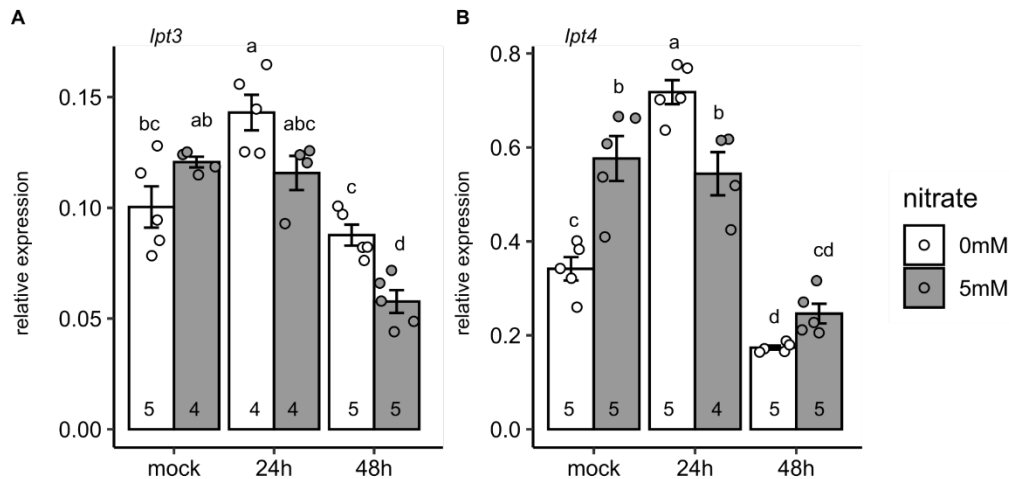

Supplementary Fig 1. Nitrate inhibits induction of symbiotic cytokinin biosynthesis. Relative transcript abundance by qRT-PCR 1 and 2 days post inoculation (dpi) with *M. loti* in absence and presence of 5 mM  $\text{KNO}_3$ . Bars show mean  $\pm$  SE for *n* values as shown below the respective groups in qRT-PCR. Significant differences between nitrate presence and absence conditions is indicated by different letters ( $p < 0.05$ ) as determined by ANOVA and Tukey post-hoc testing with pairwise P-values available in the Source Data file.

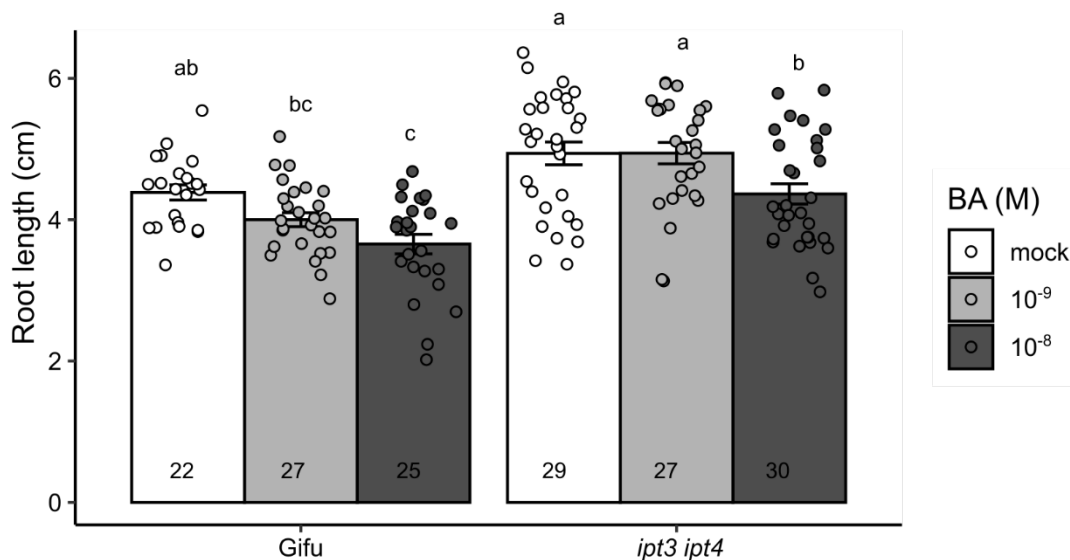

Supplementary Fig 2. *ipt3 ipt4* retains sensitivity to cytokinin inhibition of root length. Primary root length in the presence of 5 mM  $\text{KNO}_3$  with mock,  $10^{-9}$  or  $10^{-8}$  M BA at 7 days after germination of the indicated host genotypes. *n* is indicated on the bars. Significant differences among different genotypes and concentration of BA are indicated by letters ( $p < 0.05$ ) as determined by ANOVA and Tukey post-hoc testing with pairwise P-values available in the Source Data file.

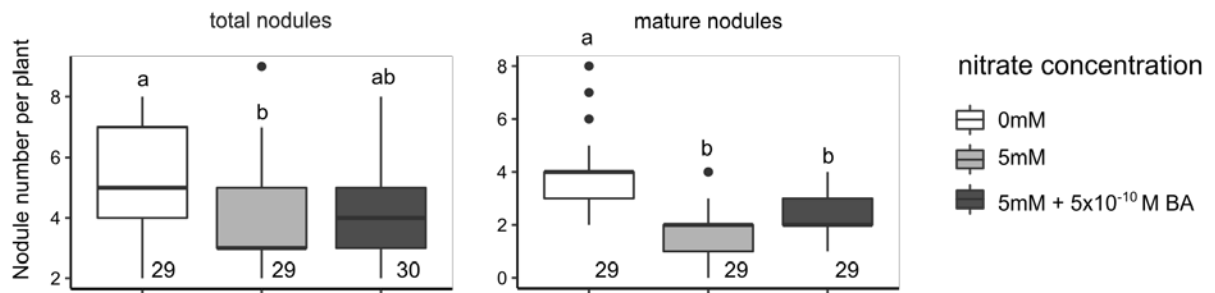

Supplementary Fig 3. Nodule numbers in the presence of 5 mM KNO<sub>3</sub> with 5x10<sup>-10</sup> M BA at 14 days after inoculation with *M. loti*. Significant differences among different treatments are indicated by letters (p<0.05) as determined by ANOVA and Tukey post-hoc testing for *n* as indicated below boxplot. Box plots show Min, Q1, Median, Q3, Max and outlier values. Pairwise P-values are available in the Source Data file

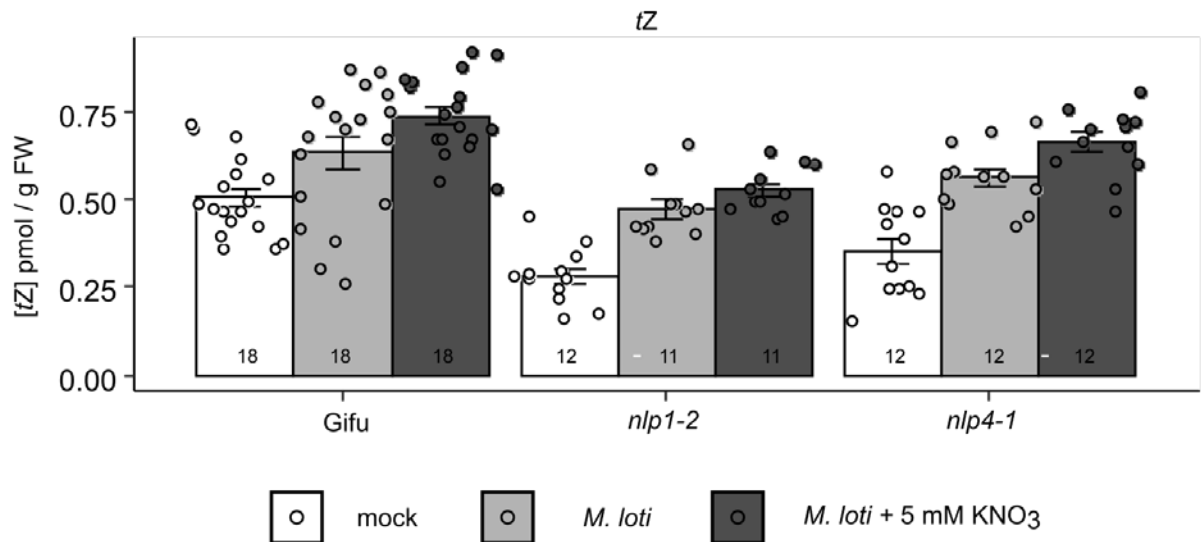

Supplementary Fig 4. Cytokinin *tZ* free base content in the indicated genotypes at 2 dpi with *M. loti*. Bars show mean ±SE for *n* indicated on the bars. No significant differences were found between nitrate presence and absence conditions as determined by Wilcoxon rank-sum test.

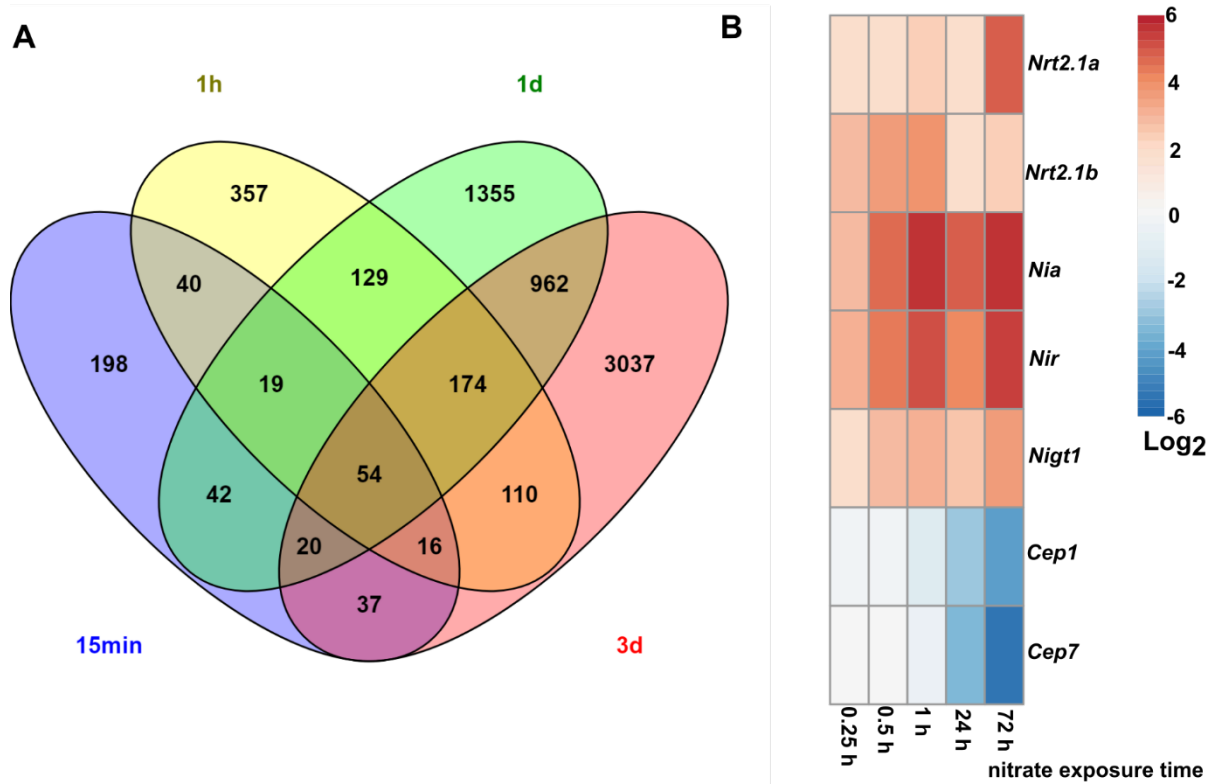

Supplementary Fig 5. Nitrate response in RNAseq study. A, A Venny diagram<sup>67</sup> of different expression genes under time series of nitrate exposure. Differentially expressed genes are those with an adjusted  $p < 0.1$ . B, Heatmap of nitrate marker gene expression under the time series of nitrate exposure. The expressions are normalized to mock treatment.

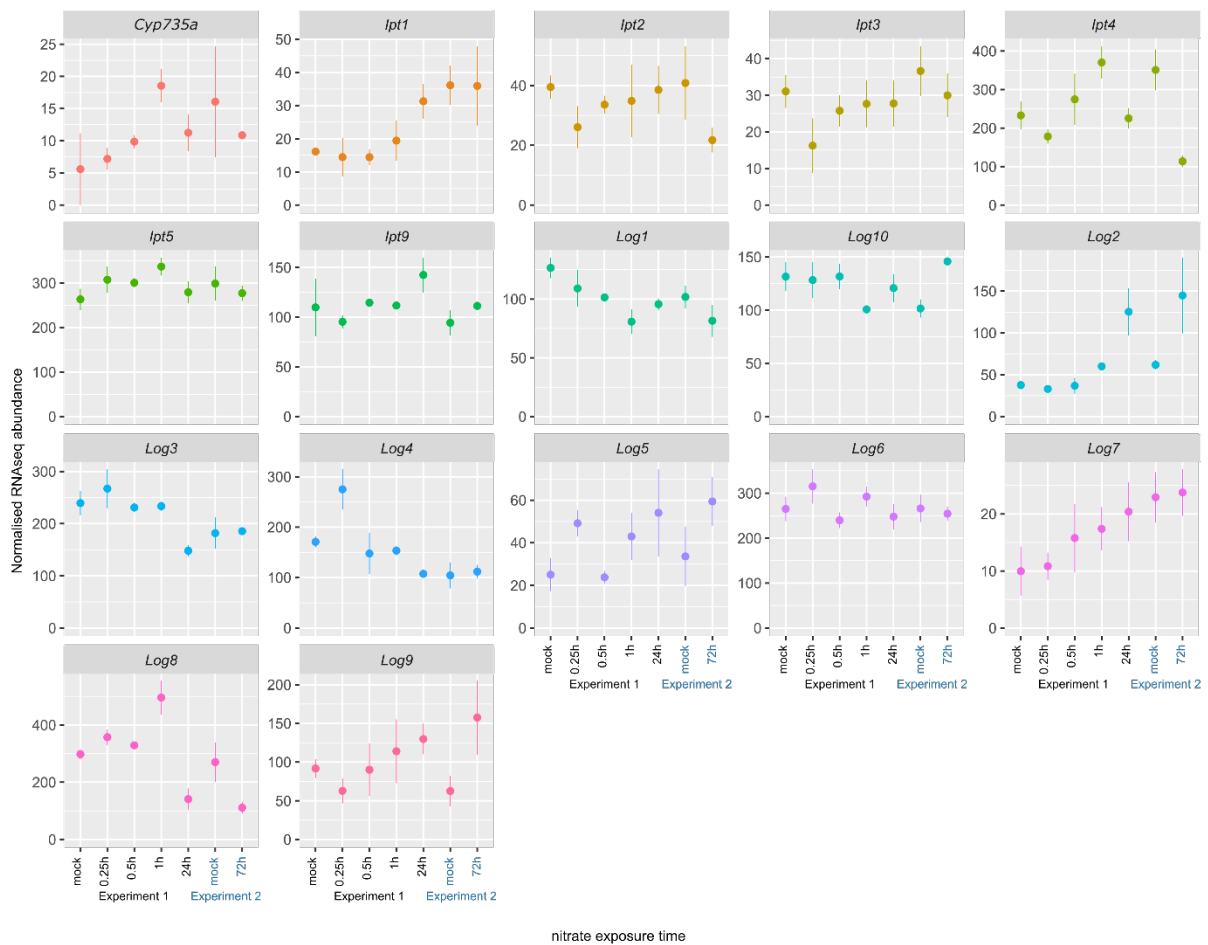

Supplementary Fig 6. Cytokinin biosynthesis gene responses to nitrate exposure. Transcript abundance determined by RNAseq of *Cyp735*, *Ipt* and *Log* genes following nitrate exposure at the indicated times. Values are mean normalised transcript abundance  $\pm$  SE for  $n=3$  replicates.

Supplementary table 1: Gene ID and primers used in this study

| Gene name | ID                    | qPCR primer               | qPCR primer              |
|-----------|-----------------------|---------------------------|--------------------------|
| Ubi       | LotjaGi1g1v0401300    | atgtgcattttaagacaggg      | gaacgtagaagattgcctgaa    |
| Ipt2      | LotjaGi4g1v0351300    | GAGGAAGCAGAGAAGGTTTGG     | CTGATGGGGTACTTGAATTCG    |
| Ipt3      | LotjaGi5g1v0164300    | GGAAGGTGGTGGCAGAGCC       | CATAACACTCTCCGTTGAAC     |
| Ipt4      | LotjaGi6g1v0298900    | GACTCTGCTGATTCGGAGG       | CCACCTGCGGTGACCTA        |
| Log1      | LotjaGi1g1v0735700    | TATATCCCCACAGCTCGTC       | CTGTCTTCCCACACCAATTT     |
| Log4      | LotjaGi1g1v0427900    | AGCTTGAGGAATATGTCC        | CTGCTATCGGTGTAATGAA      |
| Nfr1      | LotjaGi1g1v0062600    | cccttgaccacagaacc         | gctttctcttcttcttctctg    |
| Nfr5      | LotjaGi2g1v0394950    | TCATATGATGGAGGAGTTGTCTGTT | ATATGAGCTTCGGAGCATGG     |
| Nsp2      | LotjaGi1g1v0257100    | ATATGAGCTTCGGAGCATGG      | GAGATCTGAAGCGATTTAACAGC  |
| Ern1      | LotjaGi1g1v0643700    | CCACCCTTGCTCATTGTTCTG     | CCTACACTCCTCCTCTCAAG     |
| RR5       | LotjaGi4g1v0236600    | TCTTGACTCGAATTGATAGGTGC   | GATAGAGATGGCCTGCAACTACTG |
| RR9       | LotjaGi1g1v0666300    | ATCAGGAAGTGGAGGTGAATC     | TCCTTCTCCAAGCATCTGT      |
| Nin       | LotjaGi1g1v0001500    | aggagcccaagtgagtgcta      | gccatcaaggatatgacgag     |
| Cyp735a   | LotjaGi1g1v0550400    | tctccaaactcactctattgc     | cagcacaggaatccaaattg     |
| Symrk     | LotjaGi2g1v0330500    |                           |                          |
| Hmgr      | LotjaGi2g1v0352700    |                           |                          |
| Nup85     | LotjaGi1g1v0175100    |                           |                          |
| Nup133    | LotjaGi1g1v0009600    |                           |                          |
| Castor    | LotjaGi1g1v0800800    |                           |                          |
| Pollux    | LotjaGi6g1v0363700    |                           |                          |
| Ccamk     | LotjaGi3g1v0307700    |                           |                          |
| Cyclops   | LotjaGi2g1v0343300    |                           |                          |
| Nsp1      | LotjaGi3g1v0414350    |                           |                          |
| Nrt2.1a   | LotjaGi3g1v0487600    |                           |                          |
| Nrt2.1b   | LotjaGi3g1v0487700_LC |                           |                          |
| Nia       | LotjaGi1g1v0152000    |                           |                          |
| Nir       | LotjaGi4g1v0074400    |                           |                          |
| Nigt1     | LotjaGi2g1v0280600    |                           |                          |
| Cep1      | LotjaGi4g1v0106500    |                           |                          |
| Cep7      | LotjaGi4g1v0241000    |                           |                          |
| IPT1      | LotjaGi5g1v0339400    |                           |                          |
| IPT5      | LotjaGi3g1v0480000    |                           |                          |
| IPT9      | LotjaGi3g1v0156900    |                           |                          |
| LOG2      | LotjaGi1g1v0690800    |                           |                          |
| LOG3      | LotjaGi5g1v0102900    |                           |                          |
| LOG5      | LotjaGi3g1v0164600    |                           |                          |
| LOG6      | LotjaGi1g1v0368200    |                           |                          |
| LOG7      | LotjaGi2g1v0358500    |                           |                          |
| LOG8      | LotjaGi3g1v0551100    |                           |                          |
| LOG9      | LotjaGi5g1v0079100    |                           |                          |
| LOG10     | LotjaGi6g1v0150400    |                           |                          |

Supplementary table 2: mutants used in this study

| <b>mutant</b> | <b>mutant ID</b> | <b>Fwd genotyping primer</b> | <b>Rev genotyping primer</b> |
|---------------|------------------|------------------------------|------------------------------|
| ipt3-1        | 1893             | ACCCTTCCCGCCGAAATACTCGT      | TCAAAGCTCTCCATTGACCTCGCCA    |
| ipt3-2        | 12123            | ACCCTTCCCGCCGAAATACTCGT      | ATTGACCTCGCCACCTGTTTCCCC     |
| ipt4-1        | 51673            | GGTCAAATTCCGGCACACCAATCG     | AGTCTCTGTTTCGCCACCACCGGA     |
| nlp1-2        | 80714            | AGTGTTTCTGTGGATGAGCAACGC     | GCACCTACATGTAGTCCTGGACTT     |
| nlp4-1        | 106236           | CCAACAGAGGAACCTGGATTGCCA     | TGTGAAGCCATGGAGCATTGAAGC     |

Supplementary table 3: recipe of 1/4 Long Ashton

For 1 L 1/4 Long Ashton

Macroelements                      Final concentration

|                                        |           |
|----------------------------------------|-----------|
| KH <sub>2</sub> PO <sub>4</sub>        | 0.1875 mM |
| MgSO <sub>4</sub> · 7 H <sub>2</sub> O | 0.1875 mM |
| Fe-EDTA                                | 0.025 mM  |
| CaCl <sub>2</sub> · 2H <sub>2</sub> O  | 0.15 M    |

Microelements

|                                       |           |
|---------------------------------------|-----------|
| MnCl <sub>2</sub> · 4H <sub>2</sub> O | 2.5 uM    |
| H <sub>3</sub> BO <sub>3</sub>        | 12.5 uM   |
| ZnCl <sub>2</sub>                     | 0.4375 uM |
| CuCl <sub>2</sub>                     | 0.125 uM  |
| Na <sub>2</sub> MoO <sub>4</sub>      | 0.2 uM    |
| KI                                    | 0.25 uM   |
| CoCl <sub>2</sub> · 6H <sub>2</sub> O | 0.025 uM  |

use 1M PIPES to adjust PH to 6.8

Supplementary table 4: gene expression in RNA-seq (fold change Log2)

**symbiotic genes**

| ID                 | Gene    | N_15min  | N_30min  | N_1hr    | N_24h    | N_3day   |
|--------------------|---------|----------|----------|----------|----------|----------|
| LotjaGi1g1v0062600 | NFR1    | 0.233452 | -0.13409 | 0.025939 | -1.21213 | -0.09474 |
| LotjaGi2g1v0394950 | NFR5    | 1.738167 | 1.450396 | 1.918582 | -1.02996 | 0.990537 |
| LotjaGi2g1v0330500 | SYMRK   | 0.551038 | 0.278532 | 0.515252 | -0.47826 | 0.417963 |
| LotjaGi2g1v0352700 | HMGR1   | 0.435194 | -0.00379 | -0.71145 | -1.26666 | -0.40824 |
| LotjaGi1g1v0175100 | NUP85   | -0.2453  | 0.065377 | -0.1897  | 0.78871  | 0.298218 |
| LotjaGi1g1v0009600 | NUP133  | 0.156583 | 0.135258 | -0.04421 | 0.459827 | 0.572492 |
| LotjaGi1g1v0800800 | CASTOR  | -0.21608 | 0.024791 | 0.089599 | -0.24536 | 0.073006 |
| LotjaGi6g1v0363700 | POLLUX  | -0.21816 | -0.20502 | -0.03447 | -0.01654 | 0.015477 |
| LotjaGi3g1v0307700 | CCaMK   | 0.407834 | 0.20328  | 0.262606 | -0.68605 | 0.172095 |
| LotjaGi2g1v0343300 | CYCLOPS | 0.442067 | 0.073709 | 0.299389 | -0.54264 | -0.34678 |
| LotjaGi3g1v0414350 | NSP1    | 1.757873 | 2.247975 | 2.653475 | 0.875206 | 1.059292 |
| LotjaGi1g1v0257100 | NSP2    | 0.339974 | -0.25001 | -0.0133  | -2.01805 | -1.46349 |
| LotjaGi1g1v0001500 | NIN     | 0.28485  | -0.92396 | -1.42321 | -2.82617 | -1.92748 |
| LotjaGi1g1v0643700 | ERN1    | 1.200343 | 0.405313 | 0.138719 | -0.68786 | 0.17782  |

**nitrate marker genes**

| ID                   | Gene           | N_15min  | N_30min  | N_1hr    | N_24h    | N_3day   |
|----------------------|----------------|----------|----------|----------|----------|----------|
| LotjaGi3g1v0487600   | <i>Nrt2.1a</i> | 1.918003 | 1.997063 | 2.454819 | 1.954898 | 4.841707 |
| LotjaGi3g1v0487700_L | <i>Nrt2.1b</i> | 2.989983 | 3.508318 | 3.782086 | 1.773012 | 2.414457 |
| LotjaGi1g1v0152000   | <i>Nia</i>     | 2.965    | 4.731996 | 5.539115 | 4.878715 | 5.572681 |
| LotjaGi4g1v0074400   | <i>Nir</i>     | 3.249313 | 4.296373 | 5.122131 | 4.033633 | 5.269419 |
| LotjaGi2g1v0280600   | <i>Nigt1</i>   | 1.981943 | 2.765247 | 3.199917 | 2.637179 | 3.561792 |
| LotjaGi4g1v0106500   | <i>Cep1</i>    | -0.0211  | -0.22181 | -1.08941 | -2.93361 | -4.00101 |
| LotjaGi4g1v0241000   | <i>Cep7</i>    | 0.179133 | 0.095163 | -0.42652 | -3.38989 | -5.35008 |

**cytokinin biosynthesis genes**

| ID                 | Gene  | N_15min  | N_30min  | N_1hr    | N_24h    | N_3day   |
|--------------------|-------|----------|----------|----------|----------|----------|
| LotjaGi5g1v0339400 | IPT1  | -0.18038 | -0.15925 | 0.275436 | 0.955232 | -0.00332 |
| LotjaGi4g1v0351300 | IPT2  | -0.55423 | -0.23139 | -0.17794 | -0.03395 | -0.90799 |
| LotjaGi5g1v0164300 | IPT3  | -0.76763 | -0.27093 | -0.17163 | -0.16516 | -0.29385 |
| LotjaGi6g1v0298900 | IPT4  | -0.36776 | 0.238909 | 0.671592 | -0.04559 | -1.6264  |
| LotjaGi3g1v0480000 | IPT5  | 0.20205  | 0.189835 | 0.355403 | 0.084323 | -0.11047 |
| LotjaGi3g1v0156900 | IPT9  | -0.1721  | 0.068239 | 0.032092 | 0.381893 | 0.239838 |
| LotjaGi1g1v0735700 | LOG1  | -0.15874 | -0.31733 | -0.64082 | -0.40141 | -0.31564 |
| LotjaGi1g1v0690800 | LOG2  | -0.19832 | -0.0253  | 0.678125 | 1.728978 | 1.229952 |
| LotjaGi5g1v0102900 | LOG3  | 0.124695 | -0.0489  | -0.03451 | -0.69139 | 0.033429 |
| LotjaGi1g1v0427900 | LOG4  | 0.688711 | -0.20945 | -0.15546 | -0.67002 | 0.098455 |
| LotjaGi3g1v0164600 | LOG5  | 0.988409 | -0.06328 | 0.788053 | 1.11271  | 0.84424  |
| LotjaGi1g1v0368200 | LOG6  | 0.223884 | -0.14326 | 0.143556 | -0.09636 | -0.06494 |
| LotjaGi2g1v0358500 | LOG7  | 0.188094 | 0.542742 | 0.793825 | 1.00734  | 0.090812 |
| LotjaGi3g1v0551100 | LOG8  | 0.266459 | 0.143933 | 0.735254 | -1.08074 | -1.28175 |
| LotjaGi5g1v0079100 | LOG9  | -0.59015 | -0.03116 | 0.3134   | 0.499521 | 1.326805 |
| LotjaGi6g1v0150400 | LOG10 | 0.019454 | 0.002762 | -0.38199 | -0.11977 | 0.520784 |
