# Supplementary material for: Nitrate restricts nodule organogenesis through inhibition of cytokinin biosynthesis in Lotus japonicus
Source: PubMed Central journal article supplement (PMC8585978; doi:10.1038/s41467-021-26820-9), 2021-11-11
Supplement: 41467_2021_26820_MOESM3_ESM.pdf [file 41467_2021_26820_MOESM3_ESM.pdf]

## **Description of Additional Supplementary Files**

File name: Supplementary Data 1

Description: Normalised read counts for all genes

File name: Supplementary Data 2

Description: RNAseq differential expression statistics
